# Supplementary material for: Biomineralization-inspired Crystallization of Manganese Oxide on Silk Fibroin Nanoparticles for in vivo MR/fluorescence Imaging-assisted Tri-modal Therapy of Cancer
Source: Theranostics. 2019 Aug 14;9(21):6314–33. doi: 10.7150/thno.36252 (PMC6735506; doi:10.7150/thno.36252)
Supplement: Supplementary file 1 — Supplementary figures and methods. [file thnov09p6314s1.pdf]

# Supplementary Material

## **Biom mineralization-inspired Crystallization of Manganese Oxide on Silk Fibroin Nanoparticles for *in vivo* MR/fluorescence Imaging-assisted Tri-modal Therapy of Cancer**

Ruihao Yang <sup>1,2</sup>, Mengmeng Hou <sup>1,2</sup>, Ya Gao <sup>1,2</sup>, Shiyu Lu <sup>1</sup>, Lei Zhang <sup>3</sup>, Zhigang Xu <sup>1,2</sup>, Chang Ming Li <sup>1</sup>, Yuejun Kang <sup>1,2,\*</sup>, Peng Xue <sup>1,2,\*</sup>

<sup>1</sup> Key Laboratory of Luminescent and Real-Time Analytical Chemistry (Southwest University), Ministry of Education, School of Materials and Energy, Southwest University, Chongqing 400715, China.

<sup>2</sup> Chongqing Engineering Research Center for Micro-Nano Biomedical Materials and Devices, Southwest University, Chongqing 400715, China.

<sup>3</sup> Institute of Sericulture and Systems Biology, Southwest University, Chongqing 400716, China.

### **Corresponding authors**

\* E-mail: [xuepeng@swu.edu.cn](mailto:xuepeng@swu.edu.cn) (P. Xue)

\* E-mail: [yjkang@swu.edu.cn](mailto:yjkang@swu.edu.cn) (Y. Kang)

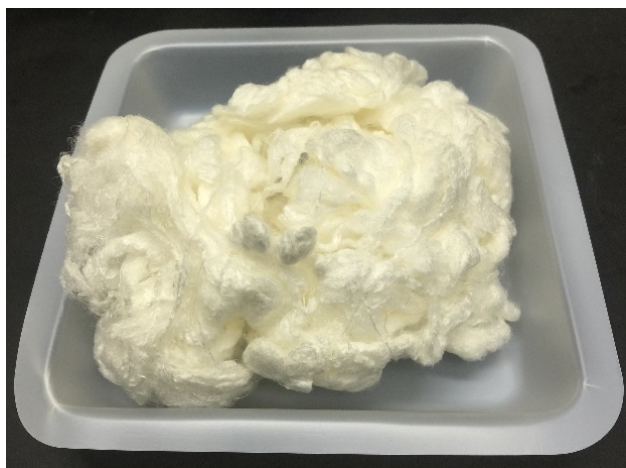

**Figure S1.** Regenerated silk fibroin (SF) obtained after a standard degumming process.

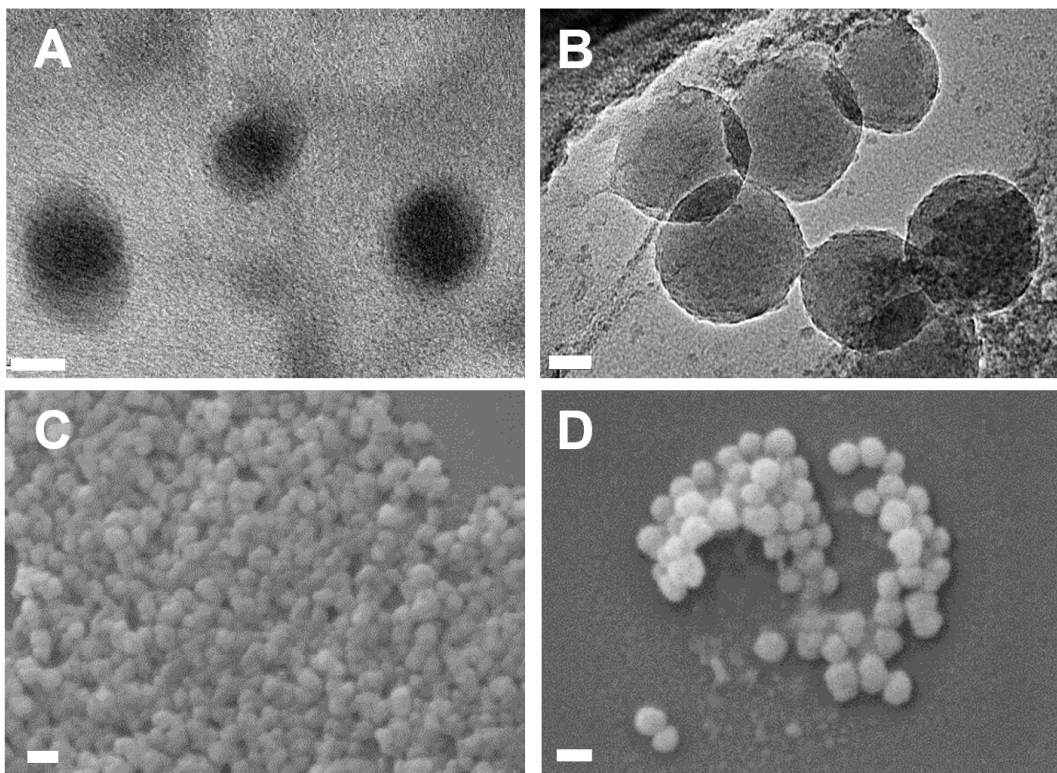

**Figure S2.** TEM images of (A) SF and (B) SF@MnO<sub>2</sub> nanoparticles (scale bars: 20 nm); SEM images of (C) SF and (D) SF@MnO<sub>2</sub> nanoparticles (scale bars: 100 nm).

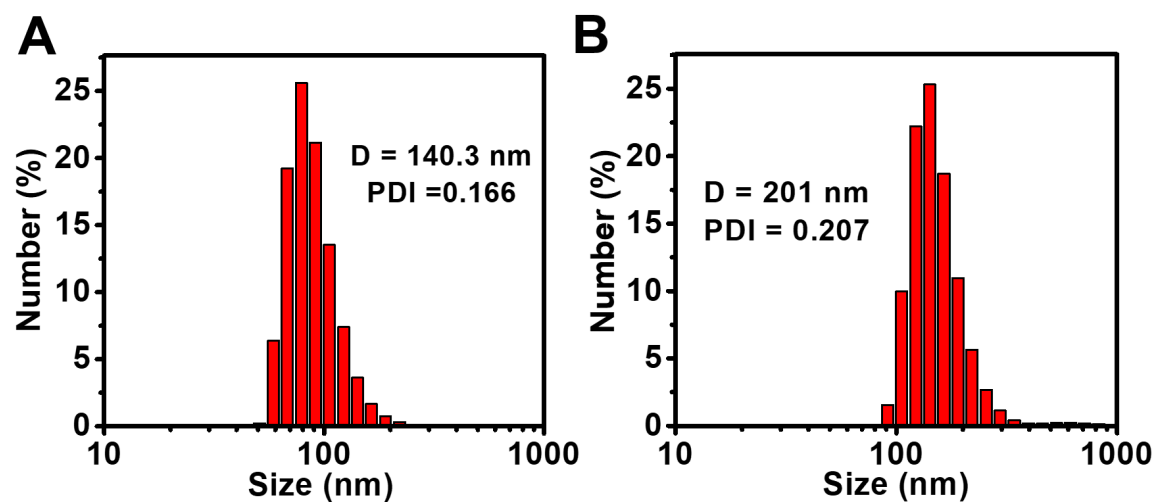

**Figure S3.** Hydrodynamic size distributions of (A) SF and (B) SF@MnO<sub>2</sub> nanoparticles measured by DLS.

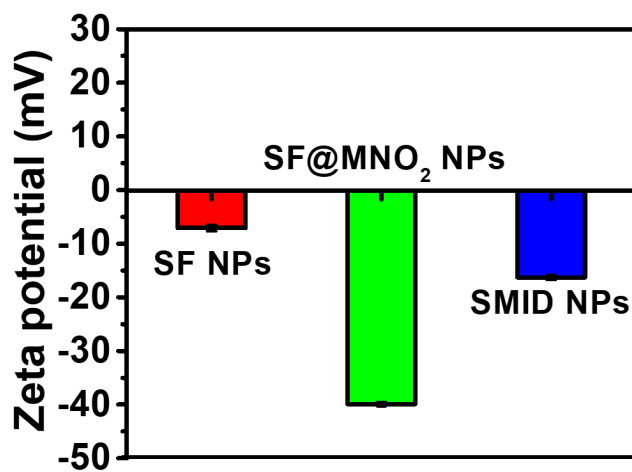

**Figure S4.** Zeta potentials of SF, SF@MnO<sub>2</sub> and SMID nanoparticles.

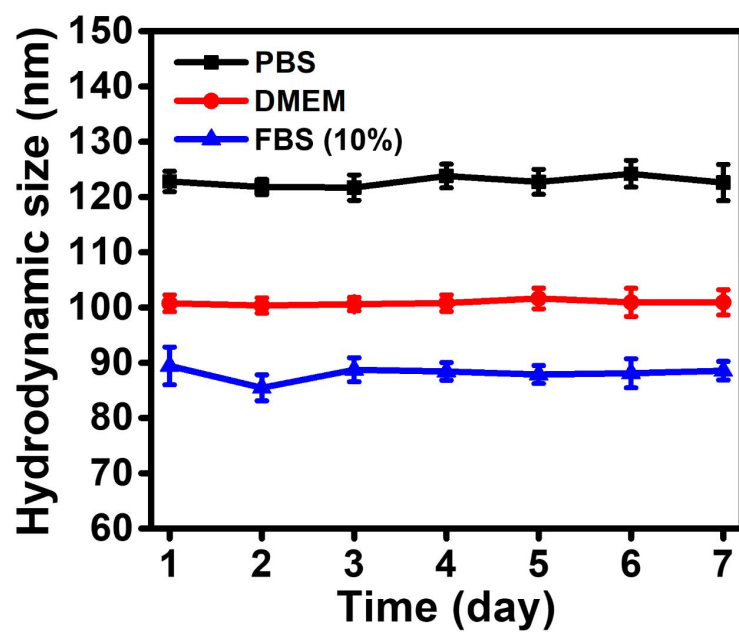

**Figure S5.** Size variation of SMID nanoparticles dispersed in PBS, DMEM or FBS (10%) during 7 days.

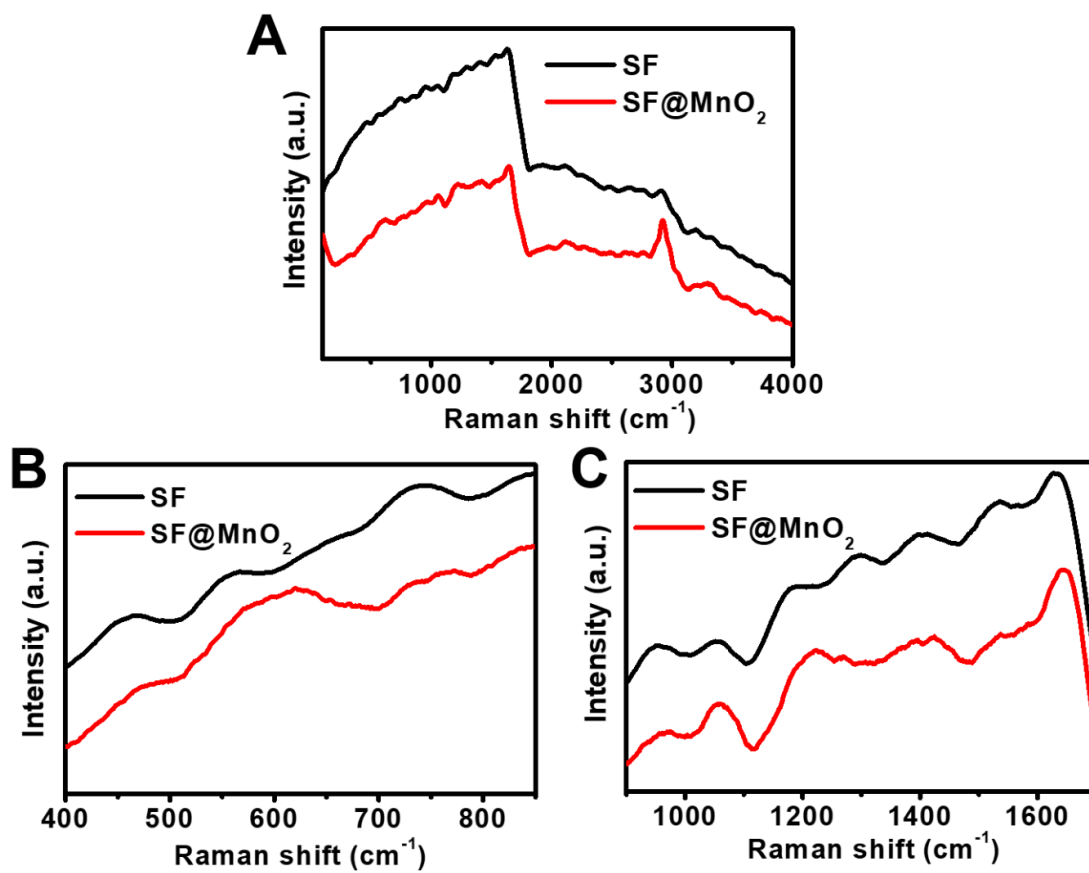

**Figure S6.** Raman spectra of SF and SF@MnO<sub>2</sub> nanoparticles: (A) a full spectrum in 100 ~ 4000 cm<sup>-1</sup>; (B) a partial spectrum in 400 ~ 850 cm<sup>-1</sup> and (C) a partial spectrum in 900 ~ 1700 cm<sup>-1</sup>.

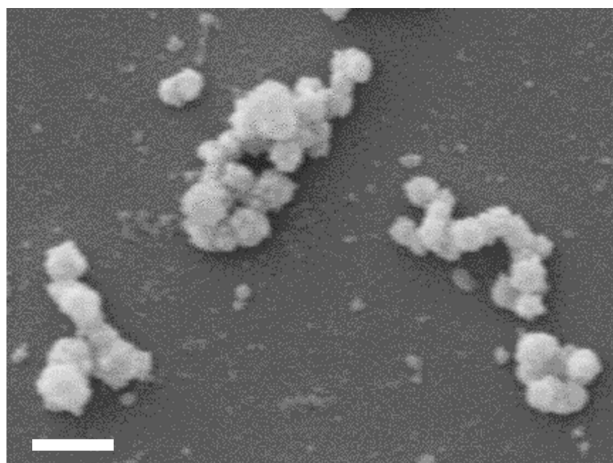

**Figure S7.** An SEM image of SF@MnO<sub>2</sub> nanoparticles obtained after the bioinspired mineralization process for 1 h (scale bar: 500 nm).

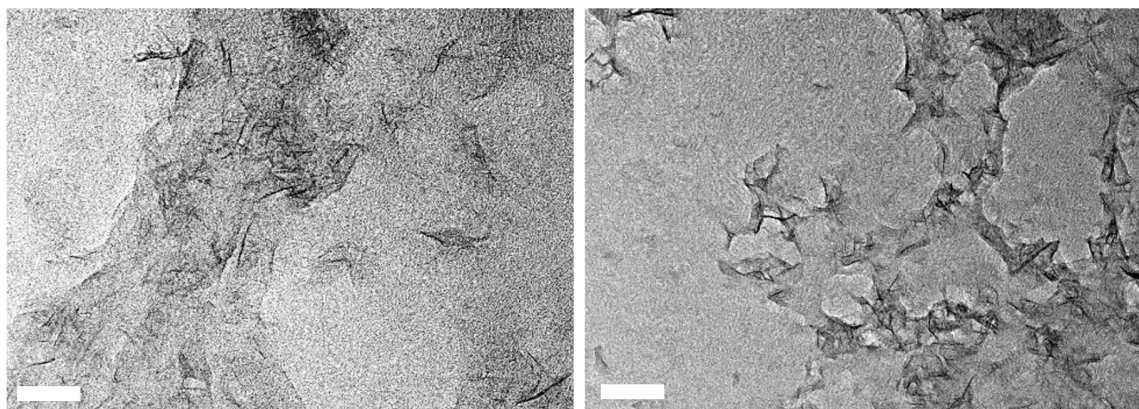

**Figure S8.** TEM images of SF@MnO<sub>2</sub> nanoparticles obtained after the bioinspired mineralization reaction for 24 h (scale bars: 100 nm).

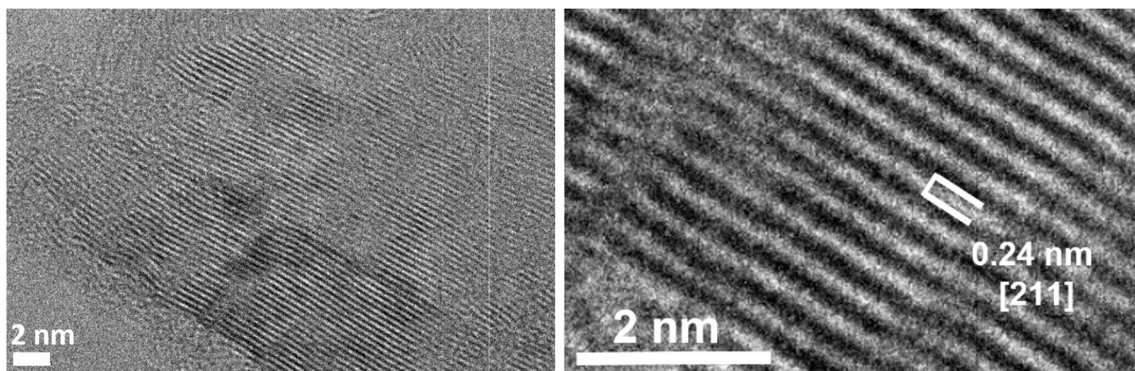

**Figure S9.** High-resolution TEM images of SF@MnO<sub>2</sub> nanoparticles under different magnifications.

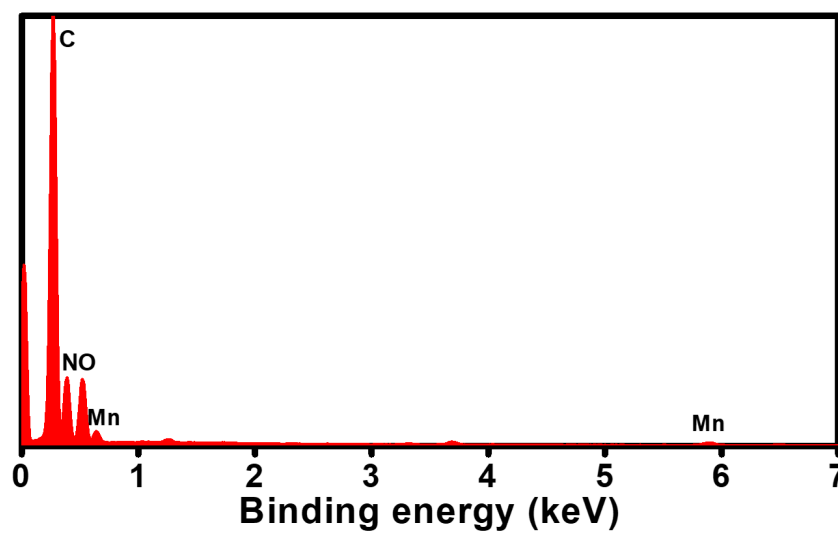

**Figure S10.** EDS pattern of SF@MnO<sub>2</sub> nanoparticles.

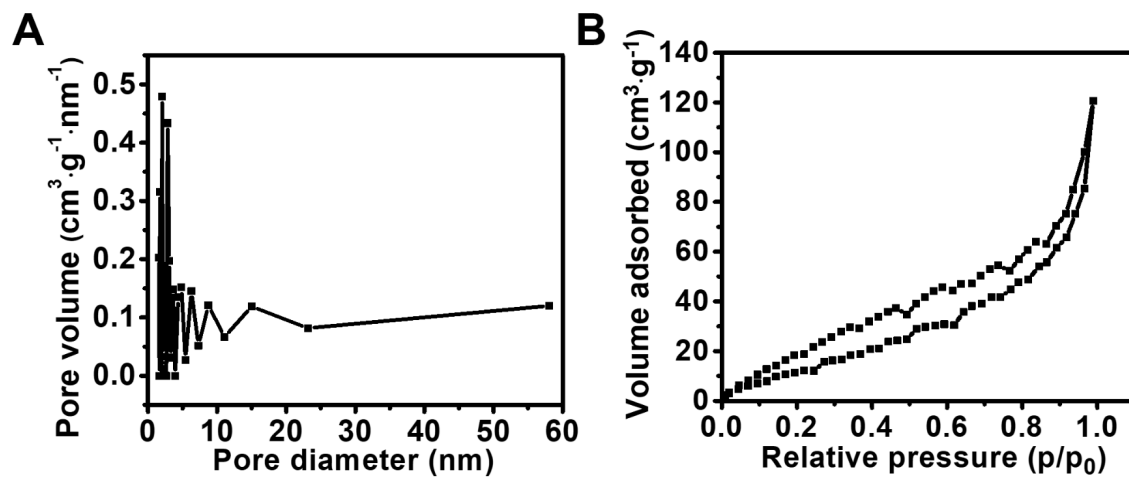

**Figure S11.** (A) Pore size distribution of SF@MnO<sub>2</sub> nanoparticles; (B) N<sub>2</sub> adsorption–desorption isotherm of SF@MnO<sub>2</sub> nanoparticles.

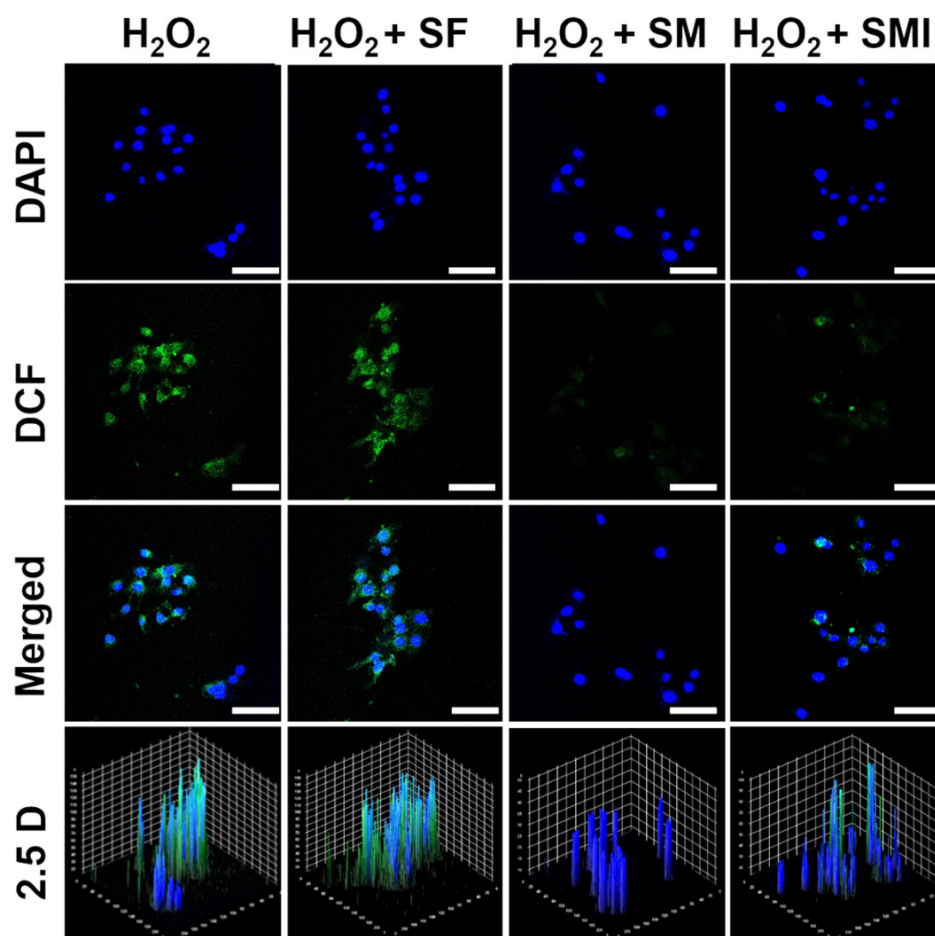

**Figure S12.** Fluorescence images of 4T1 cells after treatment with various agents (equivalent ICG concentration:  $10 \mu\text{g}\cdot\text{mL}^{-1}$ ) in the presence of 1 mM of  $\text{H}_2\text{O}_2$  (scale bars: 50  $\mu\text{m}$ ).

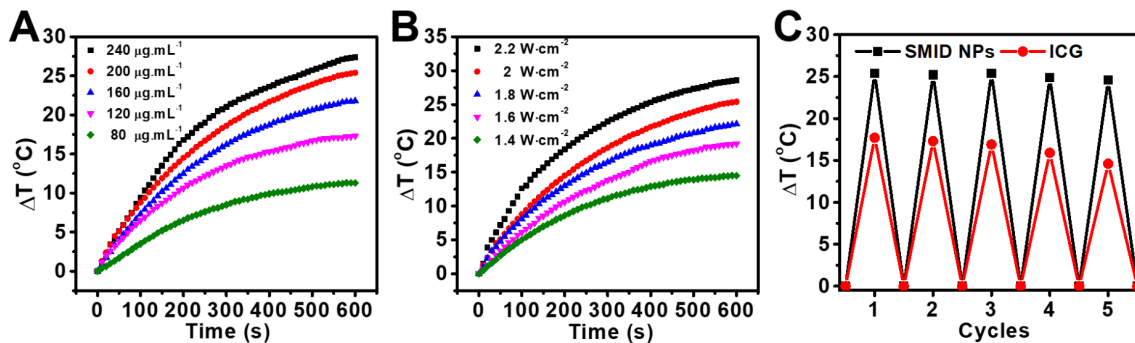

**Figure S13.** (A) Temperature elevation of SMID nanoparticle dispersions at various concentrations subject to NIR laser irradiation (808 nm, 2  $\text{W}\cdot\text{cm}^{-2}$ ) for 10 min; (B) temperature elevation of SMID nanoparticle dispersions (equivalent ICG concentration: 16  $\mu\text{g}\cdot\text{mL}^{-1}$ ) under exposure to NIR laser with different output power densities; (C) peak temperature of ICG and SMID nanoparticle dispersion (equivalent ICG concentration: 16  $\mu\text{g}\cdot\text{mL}^{-1}$ ) subject to periodic NIR laser irradiations (808 nm, 2  $\text{W}\cdot\text{cm}^{-2}$ ) for 5 cycles.

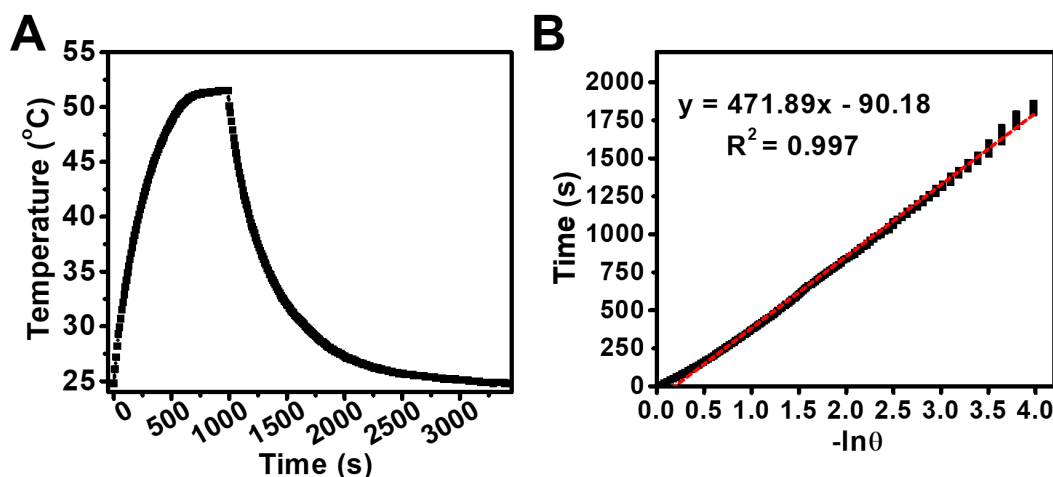

**Figure S14.** (A) Heating and cooling curves of SMID nanoparticle suspension (equivalent ICG concentration: 16  $\mu\text{g}\cdot\text{mL}^{-1}$ ) subject to NIR laser irradiation; (B) diagram of the time versus  $-\ln(\theta)$  derived from the cooling stage in (A).

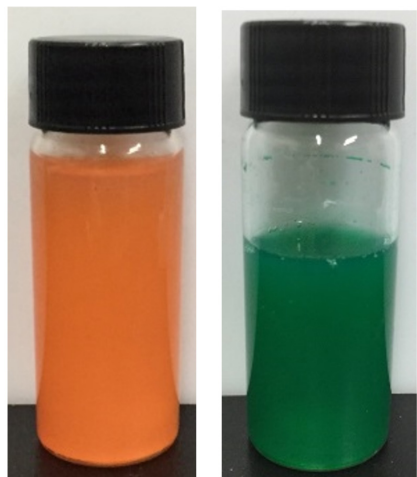

**Figure S15.** Images of SF nanoparticle dispersions after loading DOX (left) or ICG (right).

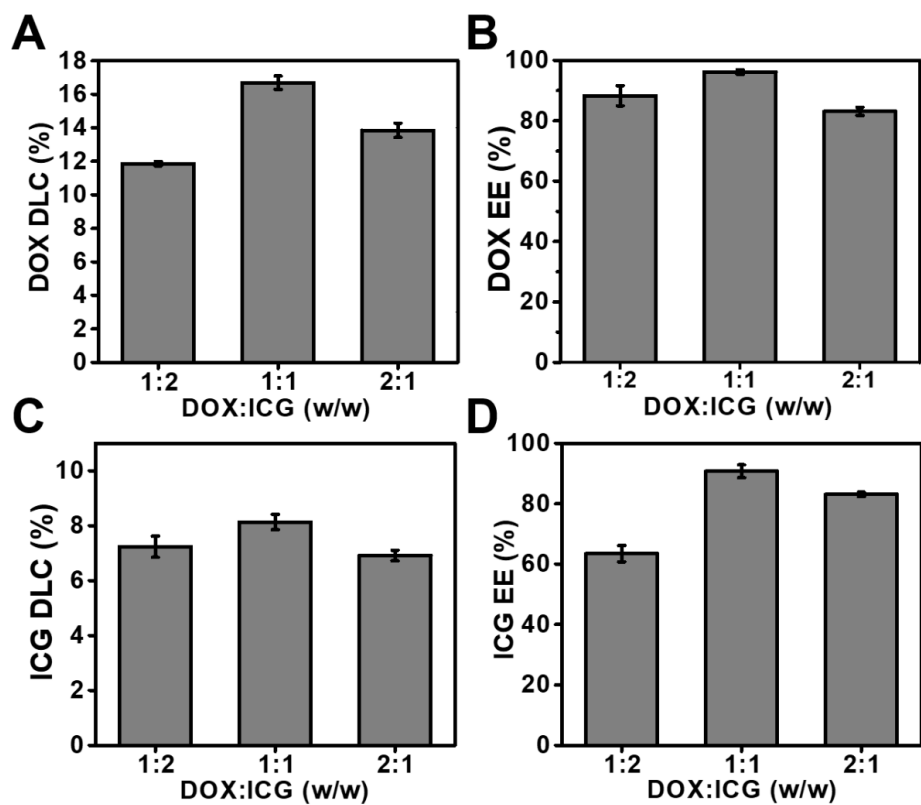

**Figure S16.** (A) DLC and (B) EE of DOX in SMID nanoparticles achieved under various mass ratios of fed drugs; (C) DLC and (D) EE of ICG in SMID nanoparticles achieved under various mass ratios of fed drugs.

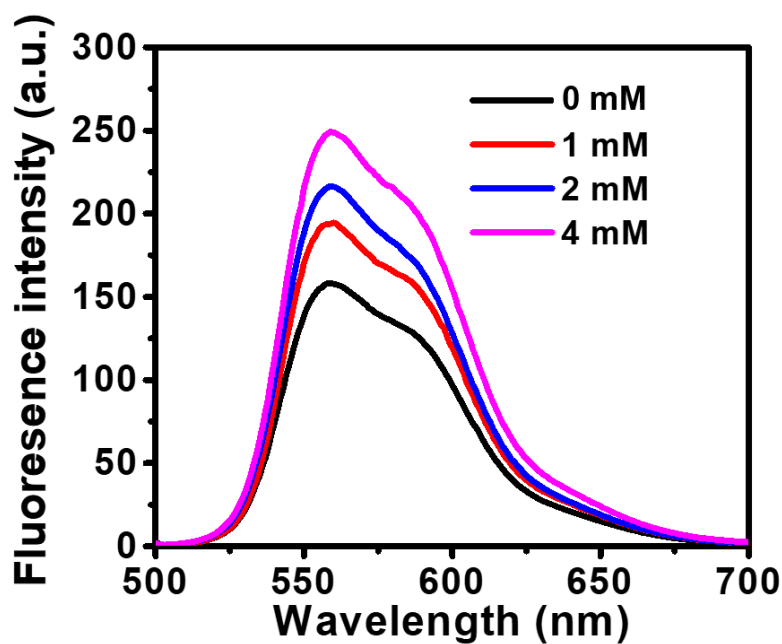

**Figure S17.** Fluorescence spectroscopy of different releasing media (10 mL) showing the released DOX from SMID nanoparticles (2 mg) after 30 min of incubation. Four releasing media tested: buffer solutions (pH = 7.4) containing 0 mM, 1 mM, 2 mM and 4 mM H<sub>2</sub>O<sub>2</sub>. Excitation wavelength: 488 nm.

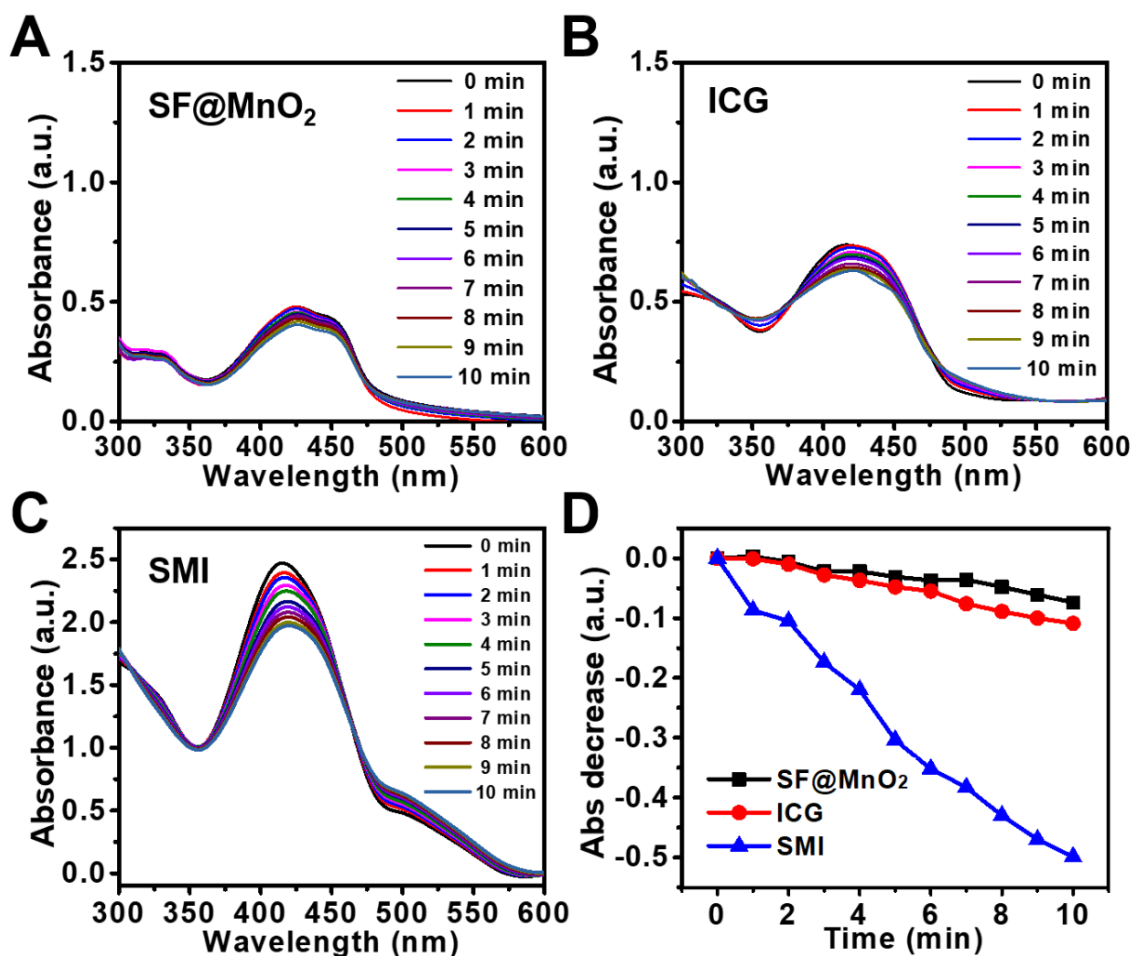

**Figure S18.** Optical absorbance spectra of DPBF incubated with (A) SF@MnO<sub>2</sub>, (B) ICG and (C) SMI (equivalent ICG concentration:  $10 \mu\text{g}\cdot\text{mL}^{-1}$ ) under laser irradiation ( $808 \text{ nm}$ ,  $2 \text{ W}\cdot\text{cm}^{-2}$ ) for various periods of time; (D) decay of the normalized peak absorbance intensity of DPBF at  $417 \text{ nm}$  as a function of irradiation time.

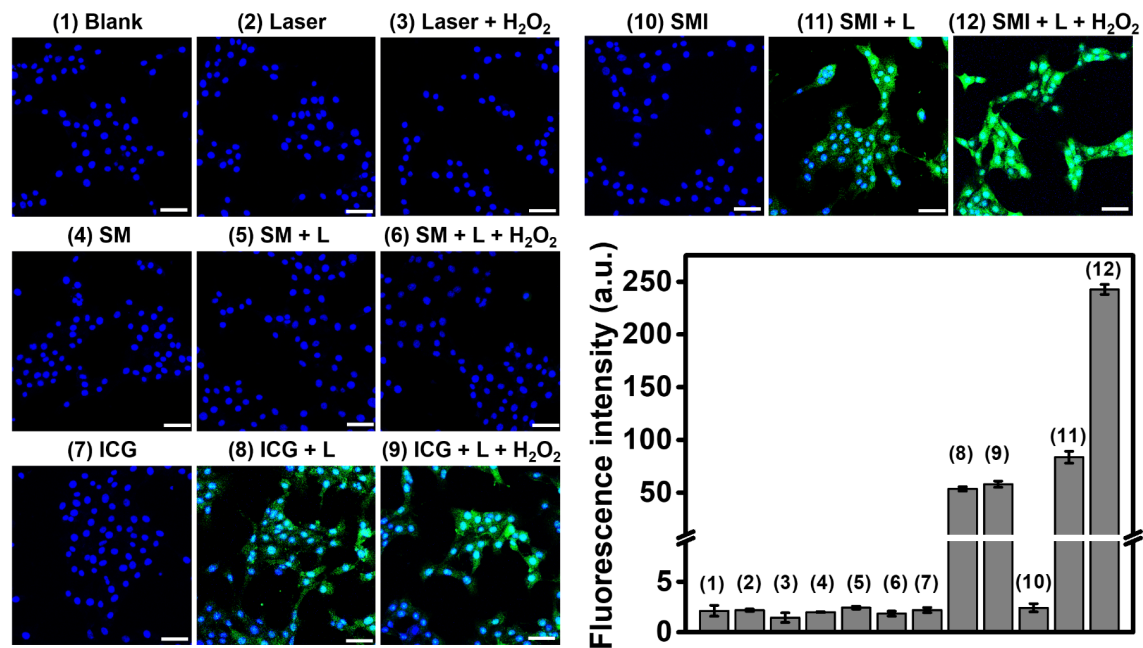

**Figure S19.** Fluorescence images and the corresponding fluorescence intensity (FITC channel) of SOSG-labeled 4T1 cells after treatment with various agents and NIR laser irradiation (10 min) or H<sub>2</sub>O<sub>2</sub> (100  $\mu$ M) where applicable. Scale bars: 50  $\mu$ m.

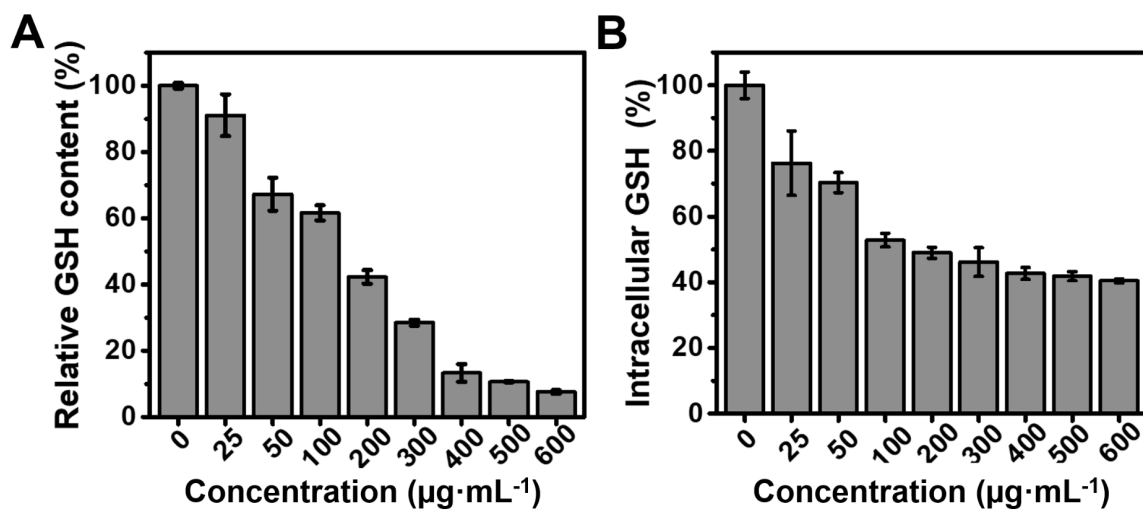

**Figure S20.** (A) Relative content of GSH after reaction with SF@MnO<sub>2</sub> at various concentrations in a test tube; (B) intracellular GSH content after treatment with SF@MnO<sub>2</sub> at various concentrations.

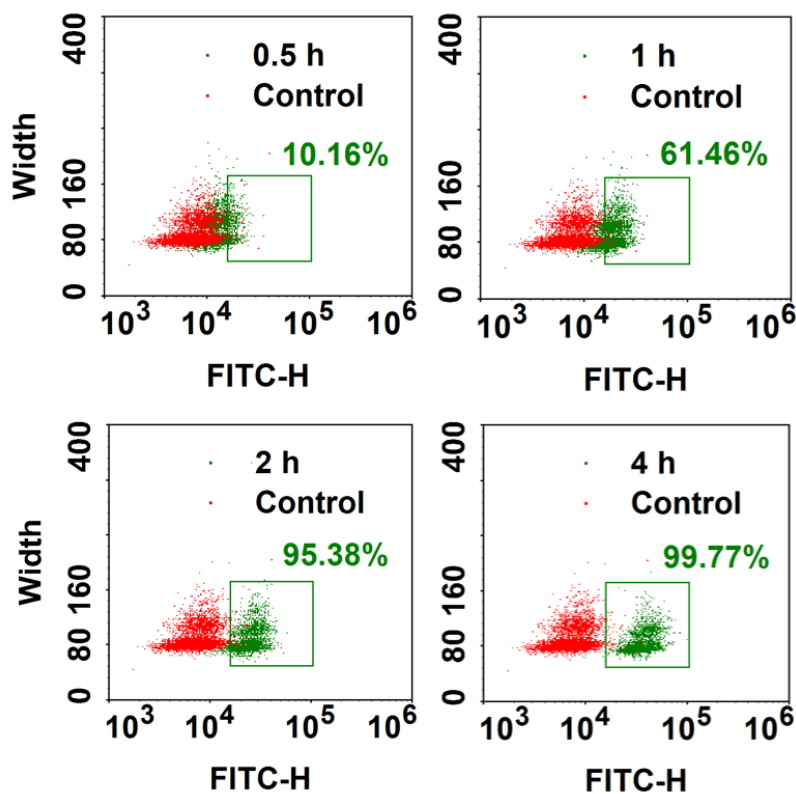

**Figure S21.** Flow cytometry analysis of 4T1 cells incubated with SMID nanoparticles over time (0.5 h, 1 h, 2 h and 4 h).

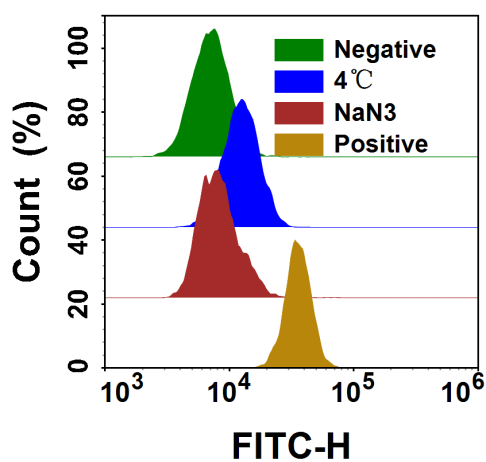

**Figure S22.** Flow cytometry analysis of the cellular uptake of SMID nanoparticles in 4T1 cells treated with NaN<sub>3</sub> (0.1%, w/v) or under 4°C for 4 h. “Positive control” denotes 4T1 cells incubated with SMID nanoparticles without any additional treatment.

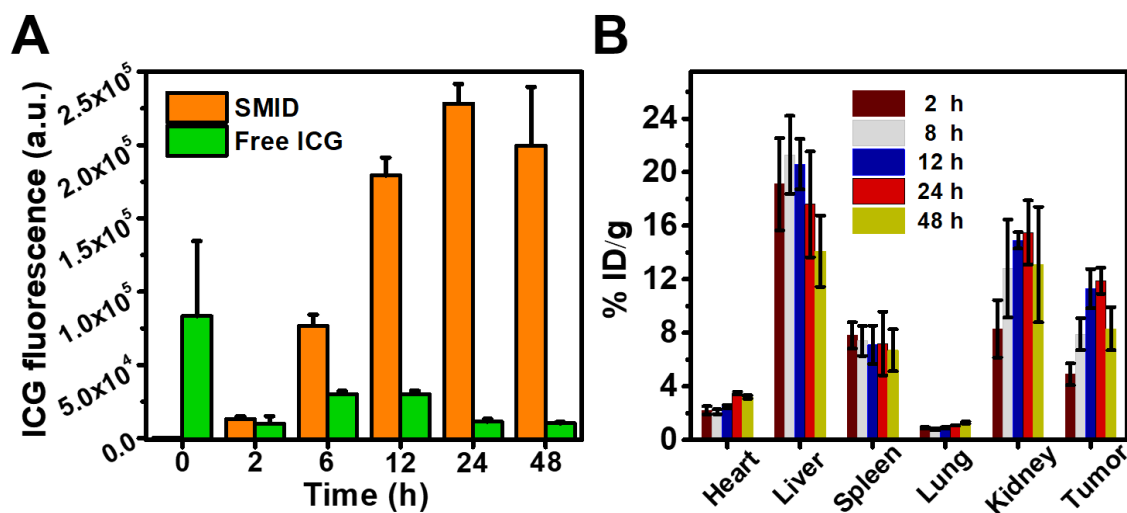

**Figure S23.** (A) Average fluorescence intensity of ICG in tumor region analyzed by ImageJ (v1.47) corresponding to Figure 6a; (B) biodistribution of Mn content in tumor-bearing BALB/c mice at different time points post-injection of SMID nanoparticles.

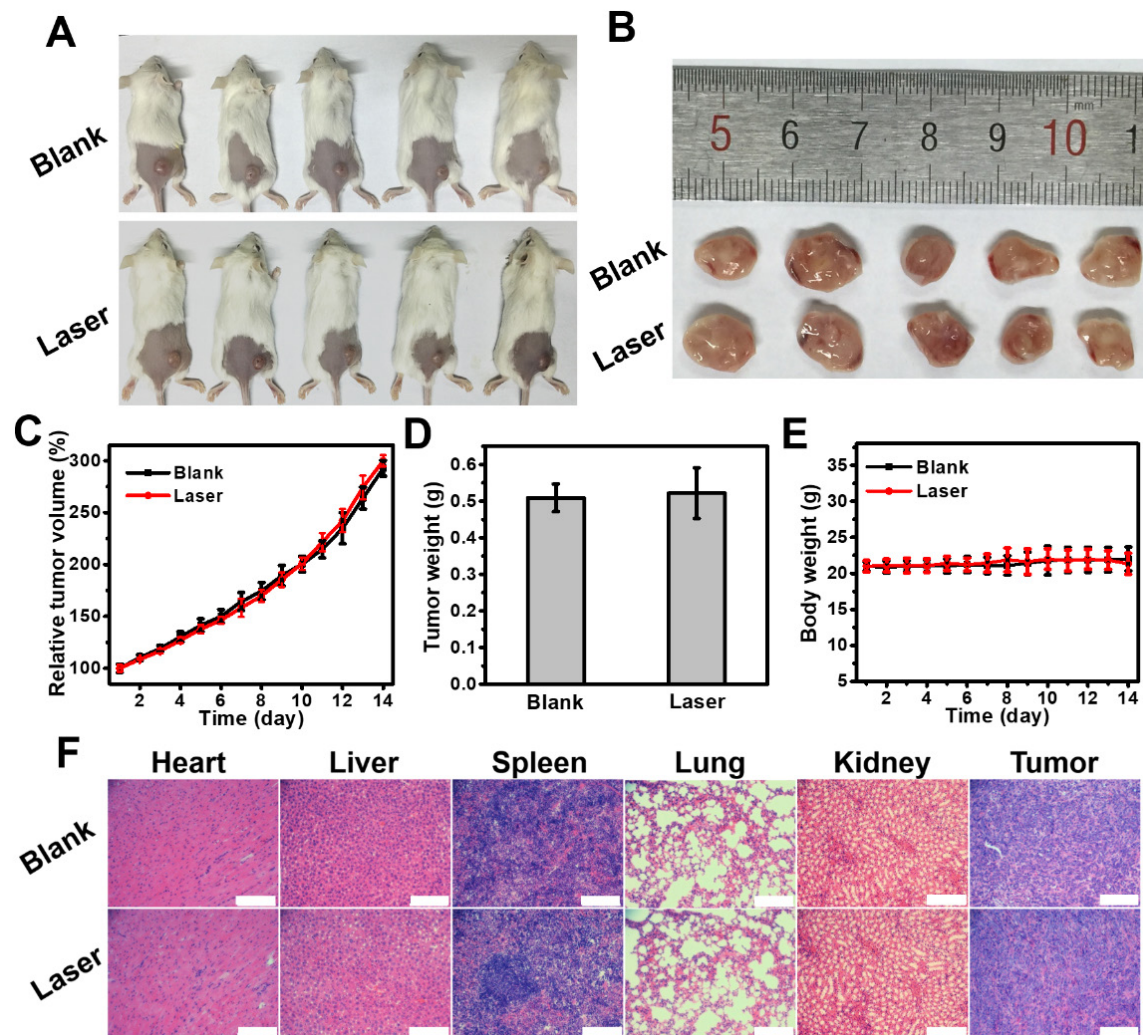

**Figure S24.** Evaluating the biosafety of NIR laser irradiation: (A) photographs of 4T1 tumor-bearing mice at day 14 after laser irradiation (808 nm,  $2 \text{ W} \cdot \text{cm}^{-2}$ ) or without any treatment; (B) photographs of excised tumors at day 14 after different treatments; (C) variation of relative tumor volume in 14 days after various treatments; (D) average weight of dissected tumors at day 14; (E) variation of mouse body weight in 14 days after various treatments; (F) H&E staining of histological sections sliced from tumors or major organs in different groups.

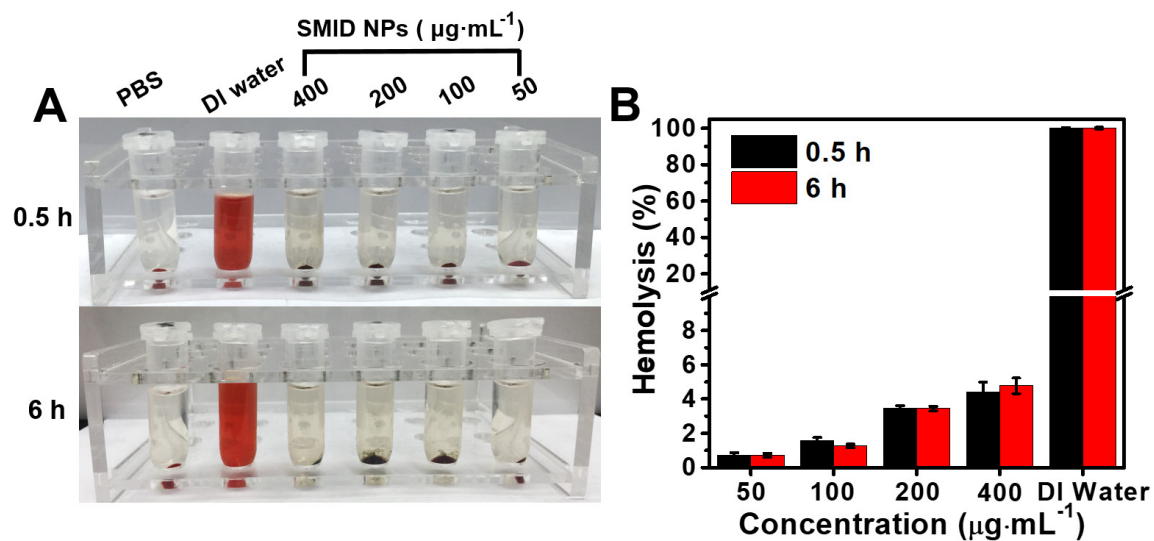

**Figure S25.** Hemocompatibility analysis: (A) photographs of erythrocytes incubated with SMID nanoparticles under various concentrations. Erythrocytes suspended in PBS and DI water served as negative and positive controls, respectively; (B) hemolytic rate of erythrocytes incubated with SMID nanoparticles under various concentrations.

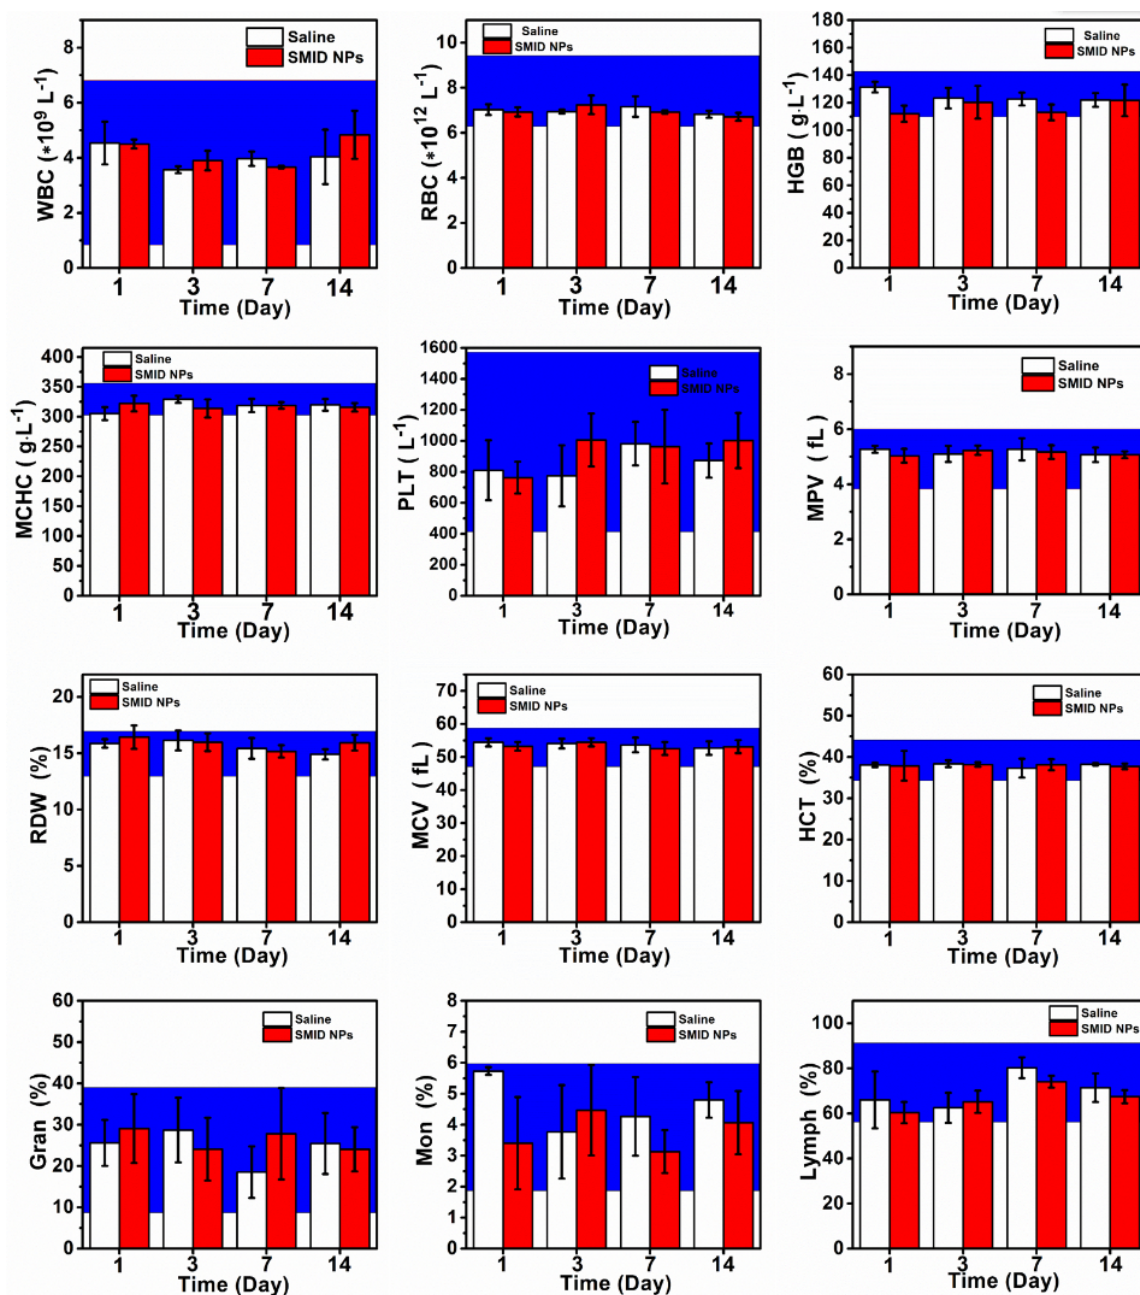

**Figure S26.** Complete blood counts of the mice intravenously injected with saline or SMID nanoparticles. The blue hatched areas represent the reference ranges of hematology data of healthy female KM mice.

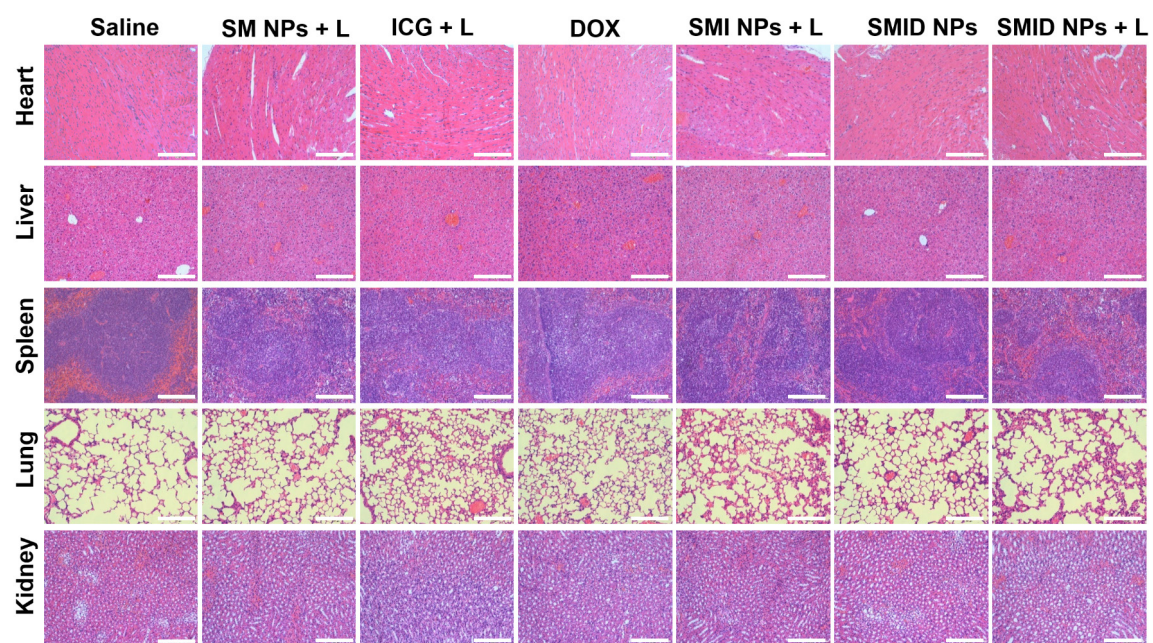

**Figure S27.** Histological analysis of major organs (heart, liver, spleen, lung and kidney) by H&E staining at day 14 post-injection (scale bars: 200  $\mu$ m).

## Supplementary Methods

### Calculation of the photothermal conversion efficiency of SMID nanoparticles<sup>1</sup>

The total energy balance between the input and dissipation for the system is presented as:

$$\sum_i M_i C_i \frac{dT}{dt} = Q_{NP} + Q_{sys} - Q_{out} \quad (1)$$

where  $M$  and  $C$  denotes the mass and heat capacity of water, respectively;  $T$  represents the medium temperature;  $Q_{NP}$  is the energy absorbed by nanoparticles;  $Q_{sys}$  denotes the energy from the pure water system;  $Q_{out}$  is heat dissipation from the system.

The heat absorbed by SMID NPs can be calculated as:

$$Q_{NP} = I(1 - 10^{-A_{808}})\eta \quad (2)$$

where  $I$  is the power of NIR laser,  $\eta$  indicates the photothermal conversion efficiency, and  $A_{808}$  denotes the absorbance of SMID nanoparticles at 808 nm.

Heat dissipation is linear to the system temperature, defined as:

$$Q_{out} = hS(T - T_{surr}) \quad (3)$$

where  $h$  is the heat transfer coefficient,  $S$  is surface area of the container, and  $T_{surr}$  is the ambient temperature.

After reaching a steady state temperature ( $T_{max}$ ), the input and output of heat are in equilibrium.

$$Q_{NP} + Q_{sys} = Q_{out} = hS(T_{max} - T_{surr}) \quad (4)$$

Upon removal of laser,  $Q_{NP} + Q_{sys} = 0$ , Eq. (1) can be converted to:

$$\sum_i M_i C_i \frac{dT}{dt} = -Q_{out} = -hS(T - T_{surr}) \quad (5)$$

$$dt = \frac{\sum_i M_i C_i}{hS} \frac{dT}{(T - T_{surr})} \quad (6)$$

$$t = -\frac{\sum_i M_i C_i}{hS} \ln \frac{T - T_{surr}}{(T_{max} - T_{surr})} \quad (7)$$

A system time constant  $\tau_s$  can be defined as

$$\tau_s = -\frac{\sum_i M_i C_i}{hS} \quad (8)$$

and  $\theta$  is introduced for substitution,

$$\theta = \frac{T - T_{surr}}{(T_{max} - T_{surr})} \quad (9)$$

which transforms Eq.(8) and Eq (9) into:

$$t = -\tau_s \ln \theta \quad (10)$$

Since  $Q_{sys}$  can be calculated based on

$$Q_{sys} = hS(T_{max, H_2O} - T_{surr}) \quad (11)$$

Eq. (4) can be expressed as

$$Q_{NP} = I(1 - 10^{-A_{808}})\eta = hS(T_{max} - T_{max, H_2O}) \quad (12)$$

$$hS = -\frac{\sum_i M_i C_i}{\tau_s} \quad (13)$$

where  $\tau_s$  is equal to 471.892 s, m is 3.0 g and c is 4.2 J/g,  $h_s$  can be calculated as 0.0267 W/°C. Substituting  $I = 2.0$  W,  $A_{808} = 4.173$ ,  $T_{max} - T_{surr} = 26.7$  °C into Eq. (12), the photothermal conversion efficiency of SMID nanoparticles can be determined as 35.65%.

## Reference

1. Tian, Q.; Jiang, F.; Zou, R.; Liu, Q.; Chen, Z.; Zhu, M.; Yang, S.; Wang, J.; Wang, J.; Hu, J. Hydrophilic Cu<sub>9</sub>S<sub>5</sub> Nanocrystals: A Photothermal Agent with a 25.7% Heat Conversion Efficiency for Photothermal Ablation of Cancer Cells in Vivo. *ACS Nano* **2011**, 5, 9761-9771.
